# Supplementary material
Source: PubMed Central journal article supplement (PMC5346329)
Supplement: NIHMS821584-supplement-01.pdf [file NIHMS821584-supplement-01.pdf]

## Supplemental Material

**Title:** Frequency of Extreme Heat Events and Hay Fever Prevalence Among Representative Sample of US Adults: 1997-2013

**Authors:** Crystal Romeo Upperman<sup>1,2</sup>, Jennifer D. Parker<sup>3</sup>, Lara J. Akinbami<sup>3</sup>, Chengsheng Jiang<sup>1</sup>, Xin He<sup>4</sup>, Raghuram Murtugudde<sup>5</sup>, Frank C. Curriero<sup>6</sup>, Lewis Ziska<sup>7</sup>, Amir Sapkota<sup>1\*</sup>

### Table of Contents

|                                                                                                                                                                                                               |   |
|---------------------------------------------------------------------------------------------------------------------------------------------------------------------------------------------------------------|---|
| Supplemental Material, Table S1. Unadjusted and adjusted [AORs (95% CIs)] for hay fever in adults <sup>*</sup> , NHIS 1997-2013, sensitivity analysis for EHE <sub>90</sub> .....                             | 2 |
| Supplemental Material, Table S2. Unadjusted and adjusted [AORs (95% CIs)] for hay fever in adults <sup>*</sup> , NHIS 1997-2013, sensitivity analysis for EHE <sub>99</sub> .....                             | 3 |
| Supplemental Material, Table S3. Adjusted odds ratios [AORs (95% CIs)] for hay fever in adults <sup>*</sup> , NHIS 1997-2013, sensitivity analyses for EHE <sub>90</sub> and EHE <sub>99</sub> by season..... | 4 |

Supplemental Material, Table S1. Unadjusted and adjusted [AORs (95% CIs)] for hay fever in adults\*, NHIS 1997-2013, sensitivity analysis for EHE<sub>90</sub>

| EHE <sub>90</sub><br><b>Categories</b> | <b>Model 1</b><br>OR (95% CI)     | <b>Model 2</b><br>OR (95% CI)     | <b>Model 3</b><br>OR (95% CI)     |
|----------------------------------------|-----------------------------------|-----------------------------------|-----------------------------------|
|                                        | <i>P<sub>trend</sub> &lt;0.05</i> | <i>P<sub>trend</sub> &lt;0.05</i> | <i>P<sub>trend</sub> &lt;0.05</i> |
| Q1 (0-23 days) <sup>#</sup>            | 1.00                              | 1.00                              | 1.00                              |
| Q2 (24-34 days)                        | 1.04 (1.00-1.09)                  | 1.04 (1.00-1.09)                  | 1.04 (1.00-1.08)                  |
| Q3 (35-46 days)                        | 1.06 (1.02-1.10)                  | 1.06 (1.02-1.10)                  | 1.06 (1.01-1.10)                  |
| Q4 (≥47 days)                          | 1.05 (1.01-1.10)                  | 1.06 (1.01-1.10)                  | 1.05 (1.01-1.10)                  |

<sup>#</sup> Reference Category

Model 1: Unadjusted; Model 2: Adjusted for sex, age, race/ethnicity, education, family income as percent of poverty and threshold; Model 3: Additionally adjusted for urban-rural classification.

\* Includes sample adults 18 years and older with complete data.

EHE<sub>90</sub>: Extreme heat events – days where the daily TMAX value exceeded the county and calendar month specific 90<sup>th</sup> percentile threshold, calculated using 30 year of baseline data.

Supplemental Material, Table S2. Unadjusted and adjusted [AORs (95% CIs)] for hay fever in adults \*, NHIS 1997-2013, sensitivity analysis for EHE<sub>99</sub>

| EHE <sub>99</sub><br>Categories | <b>Model 1</b><br>OR (95% CI)      | <b>Model 2</b><br>OR (95% CI)      | <b>Model 3</b><br>OR (95% CI)      |
|---------------------------------|------------------------------------|------------------------------------|------------------------------------|
|                                 | <i>P<sub>trend</sub> &lt;0.001</i> | <i>P<sub>trend</sub> &lt;0.001</i> | <i>P<sub>trend</sub> &lt;0.001</i> |
| Q1 (0 days) <sup>#</sup>        | 1.00                               | 1.00                               | 1.00                               |
| Q2 (1-2 days)                   | 1.05 (1.00-1.10)                   | 1.03 (0.98-1.08)                   | 1.03 (0.98-1.08)                   |
| Q3 (3-6 days)                   | 1.11 (1.06-1.16)                   | 1.09 (1.05-1.14)                   | 1.09 (1.04-1.14)                   |
| Q4 (≥7 days)                    | 1.09 (1.04-1.14)                   | 1.08 (1.03-1.13)                   | 1.08 (1.03-1.13)                   |

<sup>#</sup> Reference Category

Model 1: Unadjusted; Model 2: Adjusted for sex, age, race/ethnicity, education, family income as percent of poverty and threshold; Model 3: Additionally adjusted for urban-rural classification.

\* Includes sample adults 18 years and older with complete data.

EHE<sub>99</sub>: Extreme heat events – days where the daily TMAX value exceeded the county and calendar month specific 99<sup>th</sup> percentile threshold, calculated using 30 year of baseline data.

Supplemental Material, Table S3. Adjusted odds ratios [AORs (95% CIs)] for hay fever in adults\*, NHIS 1997-2013, sensitivity analyses for EHE<sub>90</sub> and EHE<sub>99</sub> by season

| Quartiles                  | Hay Fever<br>AOR (95% CI)        |                                 |                                 |                                 |
|----------------------------|----------------------------------|---------------------------------|---------------------------------|---------------------------------|
|                            | Winter                           | Spring                          | Summer                          | Fall                            |
| EHE <sub>90</sub>          | <i>P</i> <sub>trend</sub> <0.001 | <i>P</i> <sub>trend</sub> <0.01 | <i>P</i> <sub>trend</sub> <0.5  | <i>P</i> <sub>trend</sub> <0.05 |
| Q1 (0-4 days) <sup>#</sup> | 1.00                             | 1.00                            | 1.00                            | 1.00                            |
| Q2 (5-6 days)              | 0.98 (0.93-1.02)                 | 1.05 (1.01-1.10)                | 1.02 (0.97-1.06)                | 1.03 (0.99-1.07)                |
| Q3 (7-13 days)             | 0.97 (0.93-1.00)                 | 1.03 (0.99-1.06)                | 1.02 (0.99-1.06)                | 1.01 (0.98-1.05)                |
| Q4 (≥14 days)              | 1.04 (1.00-1.08)                 | 1.08 (1.04-1.12)                | 1.03 (1.00-1.07)                | 1.06 (1.02-1.11)                |
| EHE <sub>99</sub>          | <i>P</i> <sub>trend</sub> <0.5   | <i>P</i> <sub>trend</sub> <0.01 | <i>P</i> <sub>trend</sub> <0.05 | <i>P</i> <sub>trend</sub> <0.5  |
| Q1 (0 days) <sup>#</sup>   | 1.00                             | 1.00                            | 1.00                            | 1.00                            |
| Q2 (1 days)                | 1.02 (0.99-1.05)                 | 1.00 (0.97-1.04)                | 1.01 (0.97-1.06)                | 1.01 (0.97-1.05)                |
| Q3 (2 days)                | 1.00 (0.96-1.05)                 | 1.02 (0.98-1.07)                | 1.04 (0.99-1.09)                | 1.00 (0.95-1.05)                |
| Q4 (≥3 days)               | 1.04 (1.00-1.08)                 | 1.07 (1.04-1.11)                | 1.05 (1.02-1.09)                | 0.97 (0.94-1.01)                |

<sup>#</sup> Reference Category

Adjusted for sex, age, race/ethnicity, education, family income as percent of poverty threshold, and urban-rural classification.

\* Includes sample adults 18 years and older with complete data

EHE<sub>90</sub>: Extreme heat events – days where the daily TMAX value exceeded the county and calendar month specific 90<sup>th</sup> percentile threshold calculated using 30 year of baseline data.

EHE<sub>99</sub>: Extreme heat events – days where the daily TMAX value exceeded the county and calendar month specific 99<sup>th</sup> percentile threshold calculated using 30 year of baseline data.
